# Supplementary material for: A pretreatment method combined matrix solid-phase dispersion with dispersive liquid–liquid micro-extraction for polybrominated diphenyl ethers in vegetables through quantitation of gas chromatography-tandem mass spectrometry (GC-MS)
Source: Royal Society of Chemistry journal article supplement (doi:10.1039/d3ra00320e), 2023-01-01
Supplement: d3ra00320e1.pdf [file d3ra00320e1.pdf]

### Supporting informations

A pretreatment method combined matrix solid-phase dispersion with dispersive liquid–liquid micro-extraction for polybrominated diphenyl ethers in vegetables through quantitation of gas chromatography-tandem mass spectrometry (GC-MS)

Sijie Xu<sup>1</sup>, Junxia Wang<sup>1,2,\*</sup>, Dengxian Deng<sup>1</sup>, Yueying Sun<sup>1</sup>, Xuedong Wang<sup>1,2</sup>, Zhanen Zhang<sup>1,\*</sup>

<sup>1</sup> School of Environmental Science and Engineering, Suzhou University of Science and Technology, Suzhou, 215009

<sup>2</sup> Jiangsu Provincial Key Laboratory of Environmental Science and Engineering, Suzhou University of Science and Technology, Suzhou, 215009

\* Corresponding authors: [wjx\\_7297@163.com](mailto:wjx_7297@163.com) and [zhanenzhang@126.com](mailto:zhanenzhang@126.com)

Jiangsu Provincial Key Laboratory of Environmental Science and Engineering, School of Environmental Science and Engineering, Suzhou University of Science and Technology, No.99, Xuefu Road, Suzhou 215009, China

Pages: 2

**Table S1 Monitored ions (quantity and quality ions) and Collision energy**

| Analytes   | Precursor | Product | Collision energy(eV) | Retention time(min) |
|------------|-----------|---------|----------------------|---------------------|
| BDE-28     | 246.0     | 139.0   | 30.0                 | 6.43                |
|            | 405.8     | 245.9   |                      |                     |
| BDE-47     | 327.0     | 218.2   | 30.0                 | 8.04                |
|            | 485.6     | 325.9   |                      |                     |
|            | 563.6     | 403.8   |                      |                     |
| BDE-100    | 403.8     | 296.7   | 30.0                 | 9.45                |
|            | 405.8     | 296.6   |                      |                     |
|            | 405.8     | 405.7   |                      |                     |
| BDE-99     | 563.6     | 403.6   | 20.0                 | 9.95                |
|            | 403.8     | 296.7   |                      |                     |
|            | 483.7     | 483.7   |                      |                     |
| BDE-154    | 485.7     | 485.7   | 30.0                 | 11.20               |
|            | 643.6     | 482.9   |                      |                     |
|            | 485.7     | 485.5   |                      |                     |
| BDE-153    | 643.6     | 482.9   | 35.0                 | 11.92               |
|            | 641.6     | 480.9   |                      |                     |
|            | 721.3     | 563.6   |                      |                     |
| BDE-183    | 563.6     | 403.6   | 30.0                 | 14.12               |
|            | 561.6     | 561.1   |                      |                     |
| 13C-PCB141 | 372.0     | 302.0   | 30.0                 | 6.79                |
|            | 374.0     | 302.0   |                      |                     |

**Table S2 The concentration of PBDEs (ng·g<sup>-1</sup>) in six real samples**

| Sample             | BDE-28 | BDE-47 | BDE-100 | BDE-99 | BDE-154 | BDE-153 | BDE-183 | Σ7PBDE |
|--------------------|--------|--------|---------|--------|---------|---------|---------|--------|
| Baby cabbage       | 3.9    | 6.4    | 11.1    | ND     | 10.4    | 28.8    | ND      | 60.6   |
| Eggplant           | 2.7    | ND     | 8.7     | ND     | 12.3    | ND      | ND      | 23.7   |
| Brassica chinensis | 4.9    | 14     | ND      | ND     | 15.4    | 3.0     | ND      | 37.3   |
| Carrots            | 17.2   | 20.6   | 16.2    | 11.7   | 11.3    | 33.3    | ND      | 110.3  |
| Chinese cabbage    | 5.6    | 9.9    | ND      | ND     | 10.5    | 23.0    | ND      | 49.0   |
| Sweet potato       | 10.3   | 8.5    | 8.0     | ND     | 16.5    | ND      | ND      | 43.3   |

Note: ND indicates non-detected.
